# Supplementary material for: The Associations of PMF1, ICAM1, AGT, TRIM65, FBF1, and ACOX1 Variants With Leukoaraiosis in Chinese Population
Source: PubMed Central journal article supplement (PMC6664056; doi:10.3389/fgene.2019.00615), 2019-07-23

# The associations of *PMF1*, *ICAM1*, *AGT*, *TRIM65*, *FBF1* and *ACOX1* variants with leukoaraiosis in Chinese population

Wen-Qing Huang, Hui-Ming Ye, Liang-Liang Cai,  
Qi-Lin Ma, Cong-Xia Lu, Sui-Jun Tong,  
Chi-Meng Tzeng, Qing Lin

## Corresponding addresses:

•Department of Neurology and Center for Brain Research ,  
The First Affiliated Hospital of Xiamen University, No.55, Zhenhai Road, Siming District, Xiamen  
City, Fujian Province, China

•Translational Medicine Research Center (TMRC),  
School of Pharmaceutical Sciences, Xiang'an Campus of Xiamen University, Xiang'an South  
Road, Xiang'an District, Xiamen City, Fujian Province, China

# Supplemental Figure 1:

Identified genotypes of 32 SNPs in 270 subjects through MALDI-TOF MS.

Major homozygote

Heterozygote

Minor homozygote

rs2984613  
(PMFI)

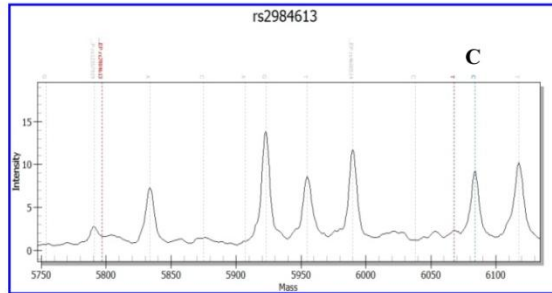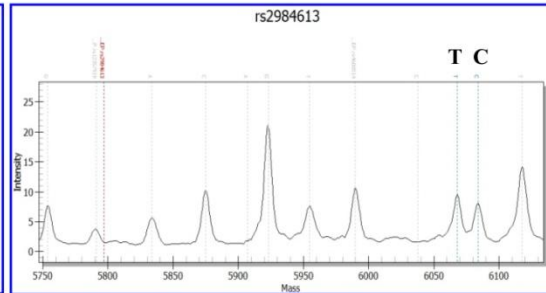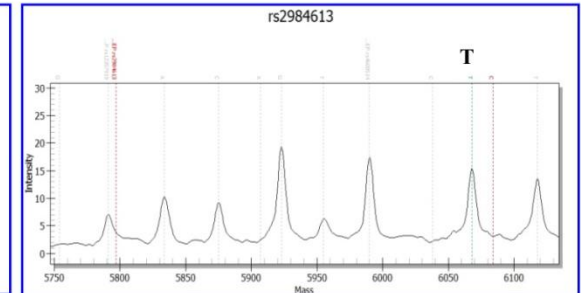

rs2305913  
(FBFI)

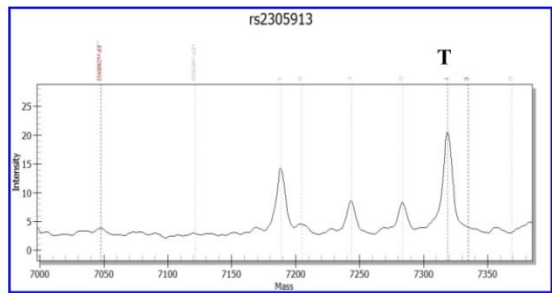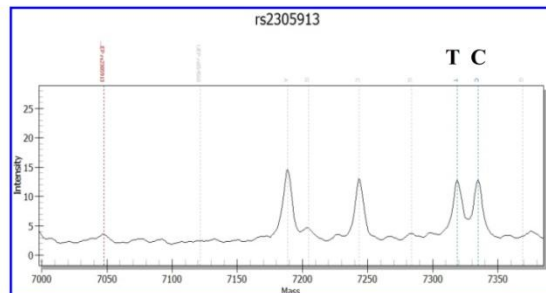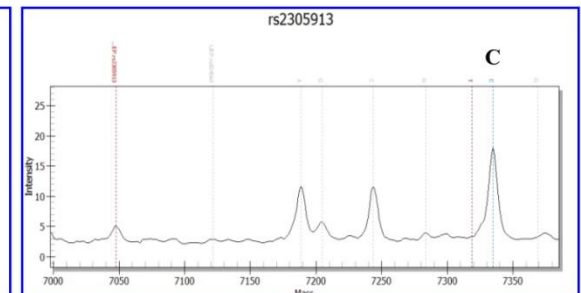

rs5498  
(ICAM1)

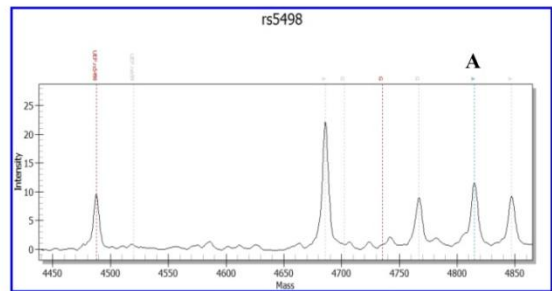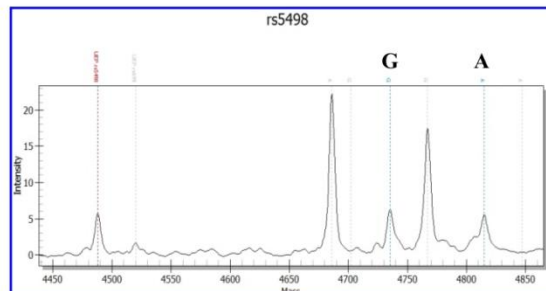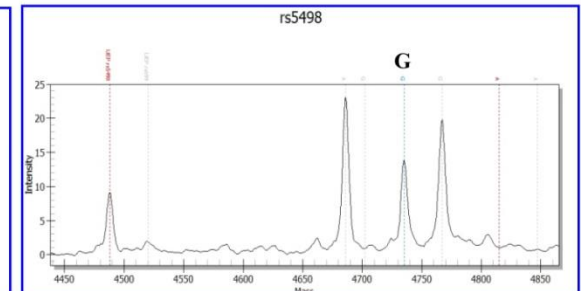

## Major homozygote

## Heterozygote

## Minor homozygote

rs7214628  
(*TRIM65*)

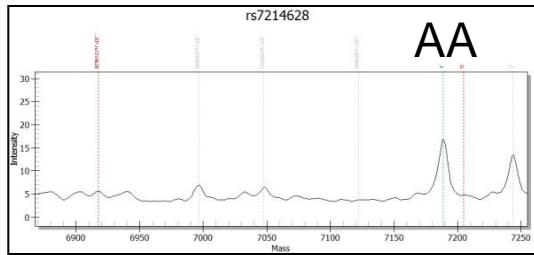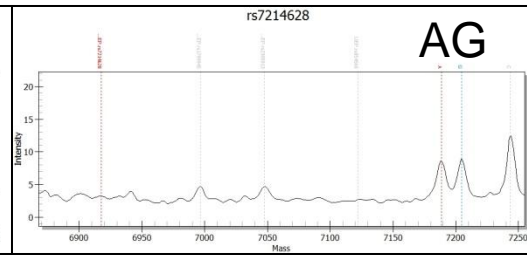

rs72848980  
(*NEURL*)

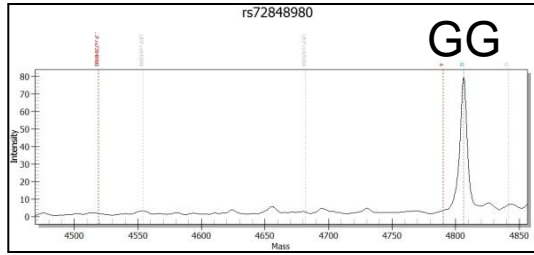

rs7894407  
(*PDCD11*)

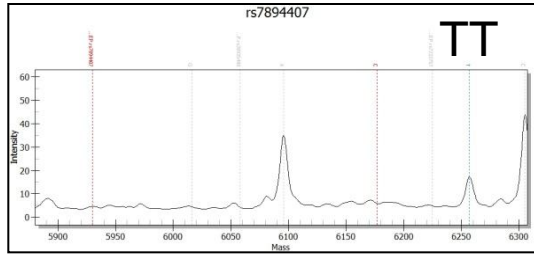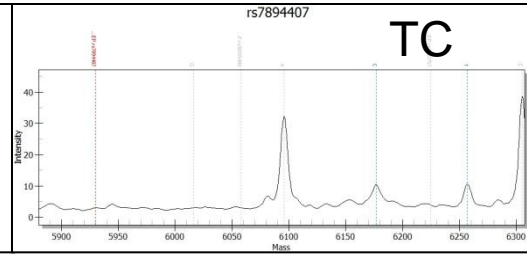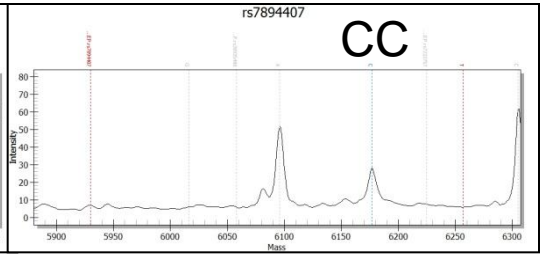

rs12357919  
(*SH3PXD2A*)

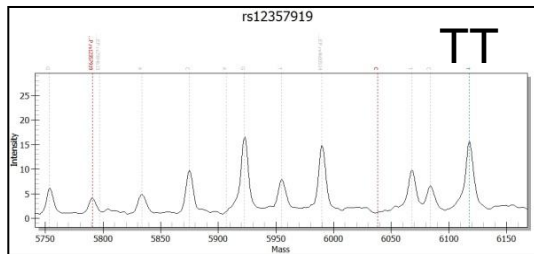

rs78857879  
(*EFEMP1*)

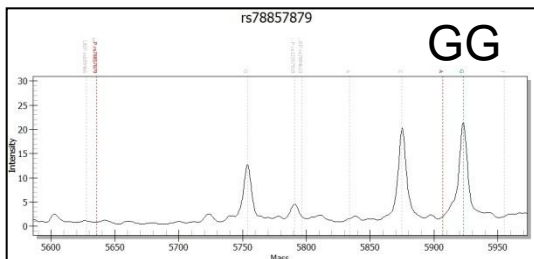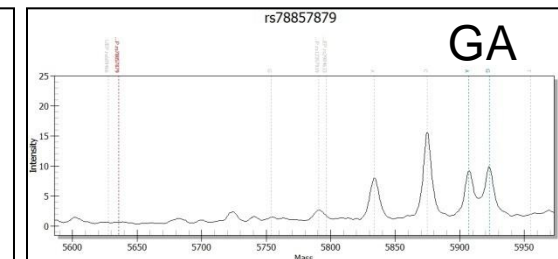

## Major homozygote

## Heterozygote

## Minor homozygote

rs1135688  
(*UNC13D*)

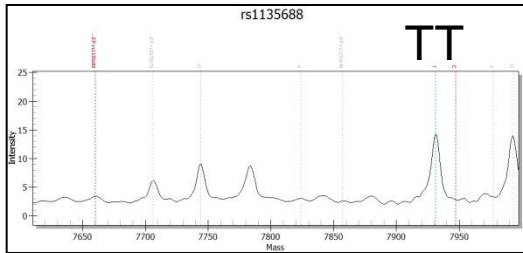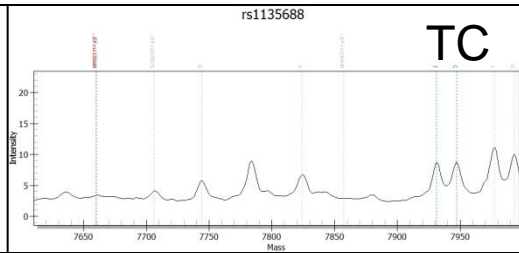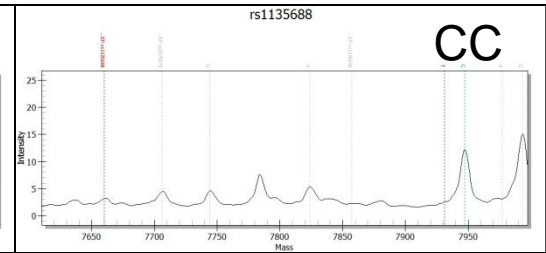

rs3760128  
(*TRIM65*)

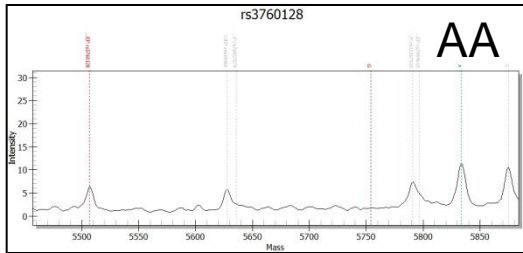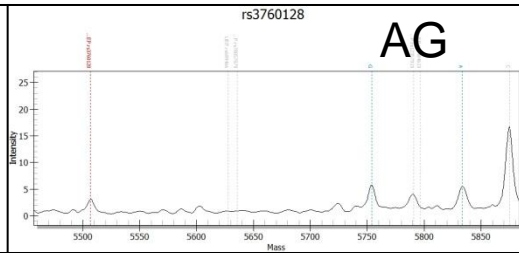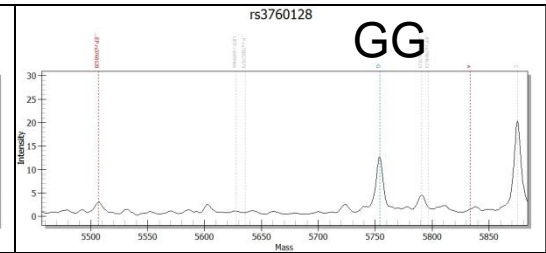

rs7222757  
(*TRIM65*)

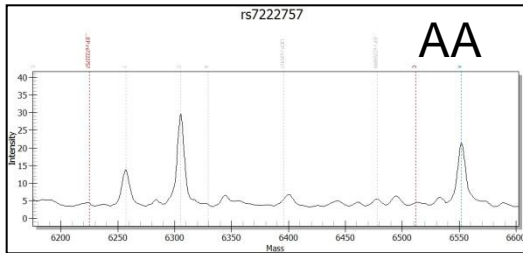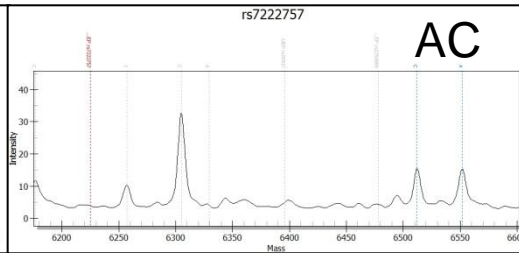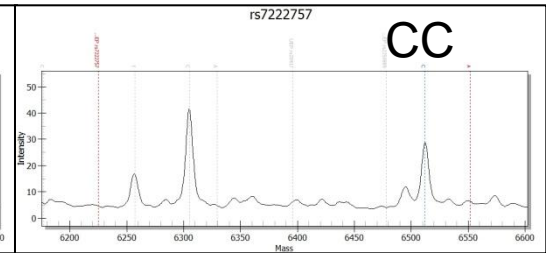

rs1135640  
(*ACOX1*)

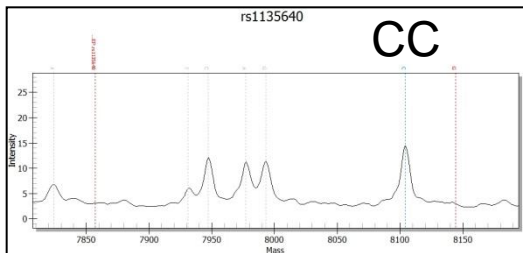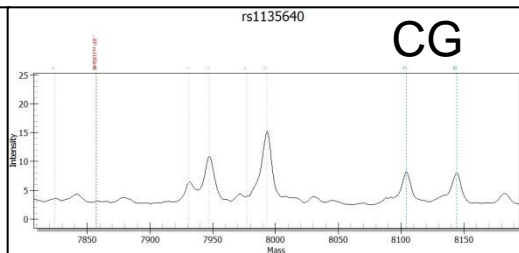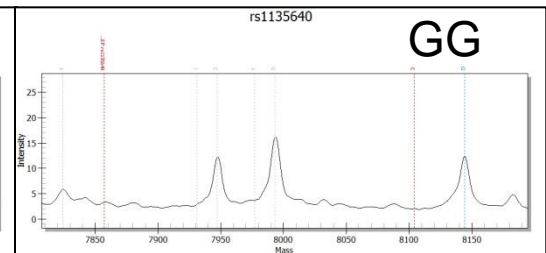

rs941898  
(*EVL*)

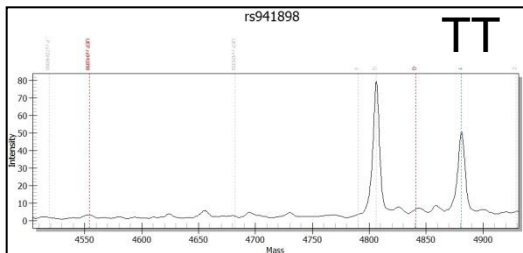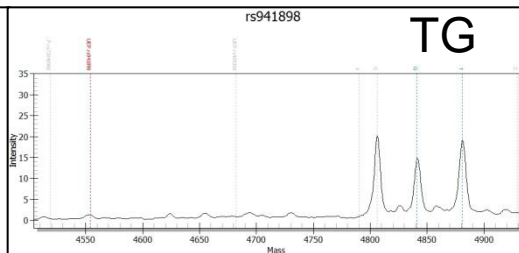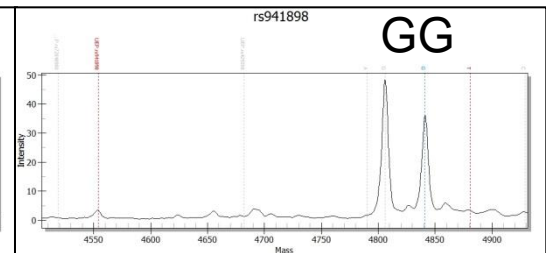

**Major homozygote**

**Heterozygote**

**Minor homozygote**

rs962888  
(*CIQL1*)

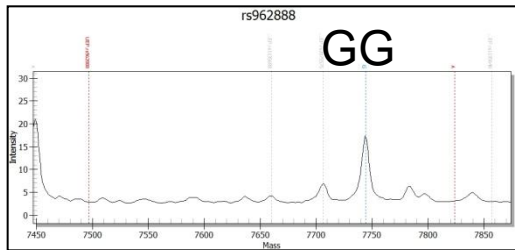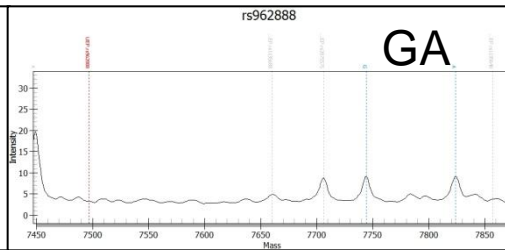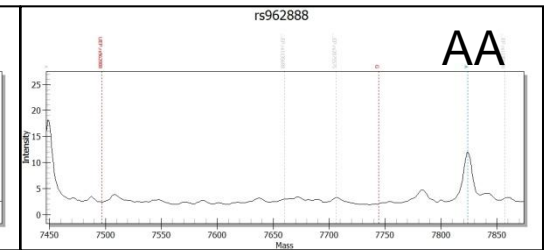

rs9515201  
(*COL4A2*)

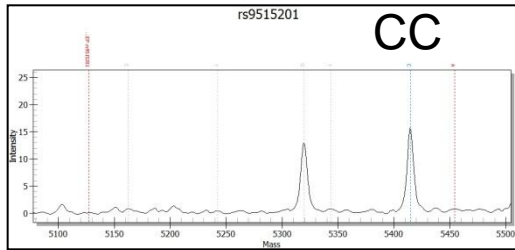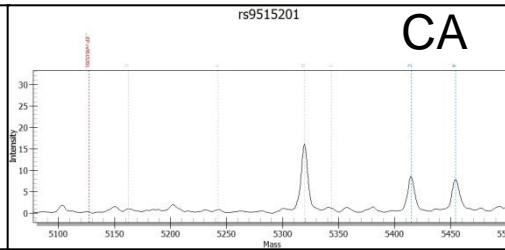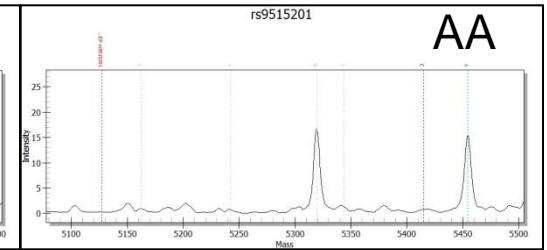

rs429358  
(*APOE*)

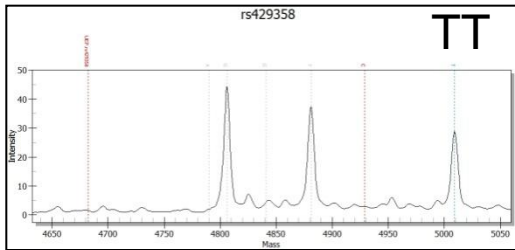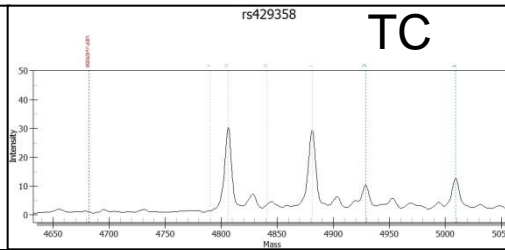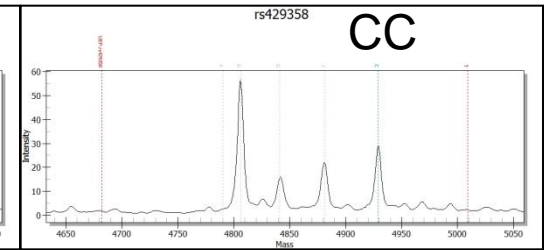

rs699  
(*AGT*)

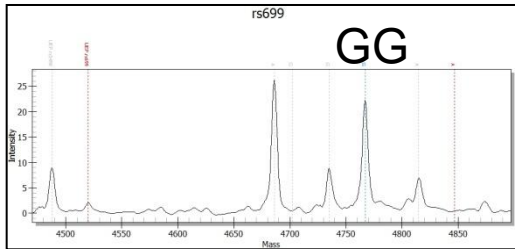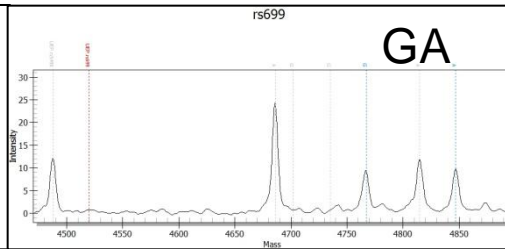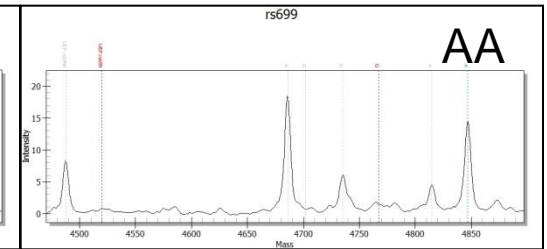

rs679620  
(*MMP3*)

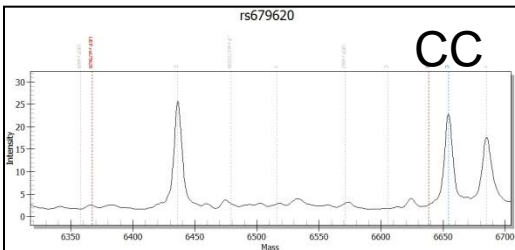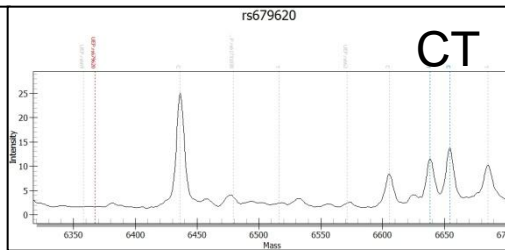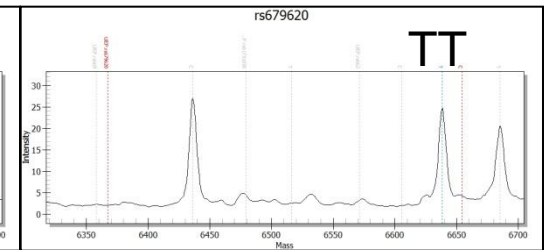

**Major homozygote**

**Heterozygote**

**Minor homozygote**

rs2250889  
(*MMP9*)

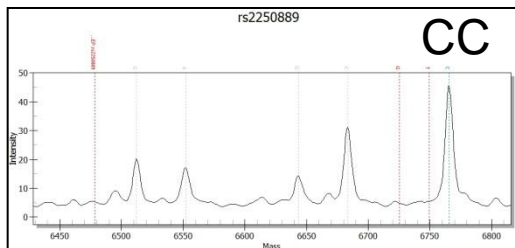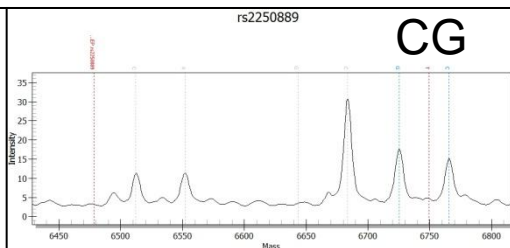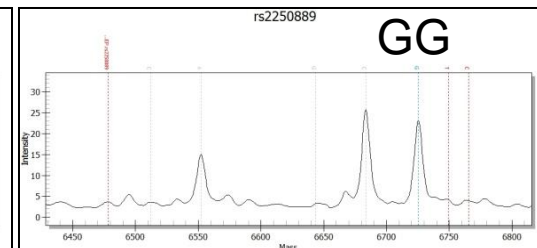

rs4961  
(*ADD1*)

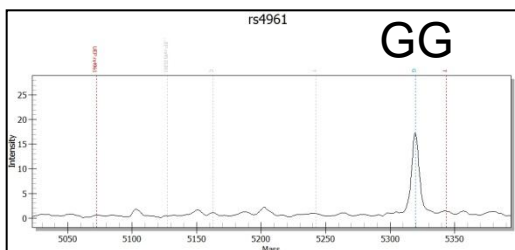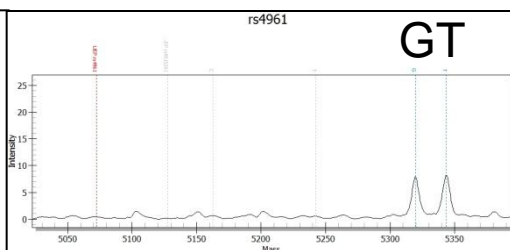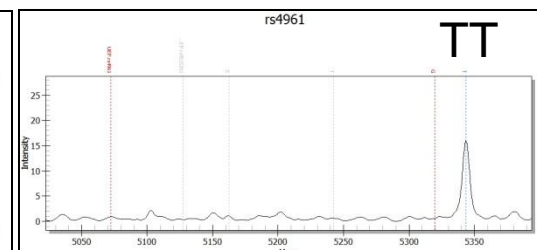

rs1799983  
(*NOS3*)

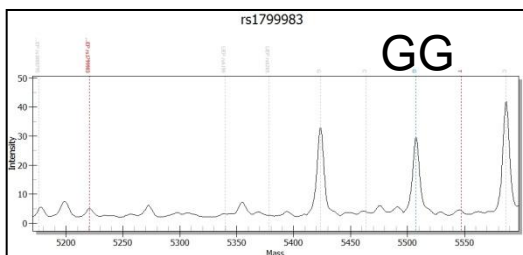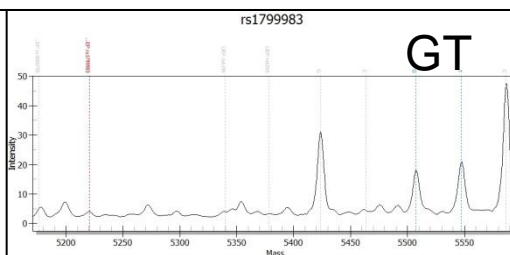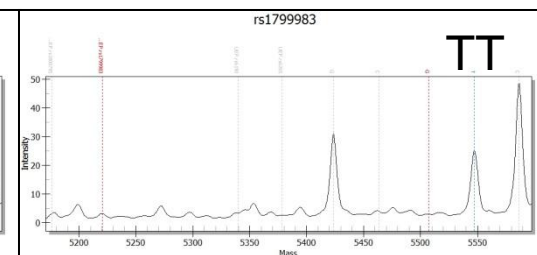

rs854560  
(*PON1*)

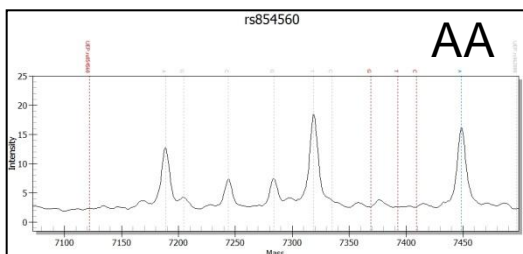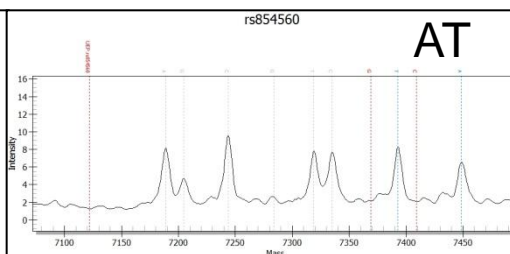

rs662  
(*PON1*)

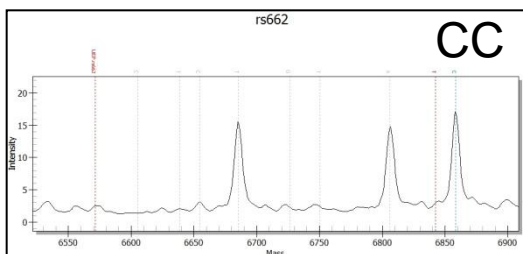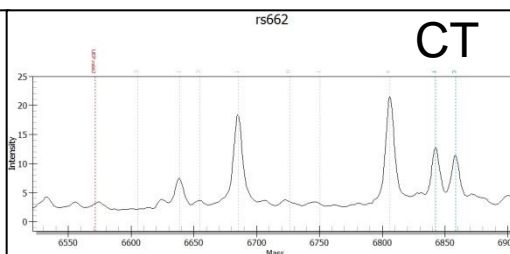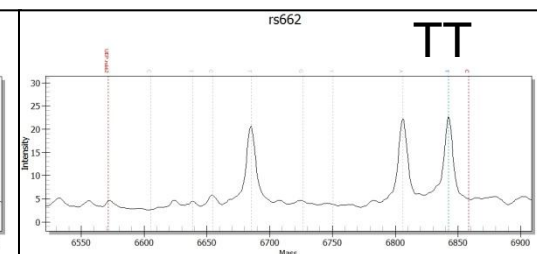



## Major homozygote

## Heterozygote

## Minor homozygote

rs669  
(*A2M*)

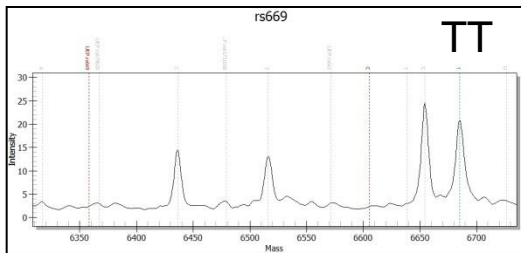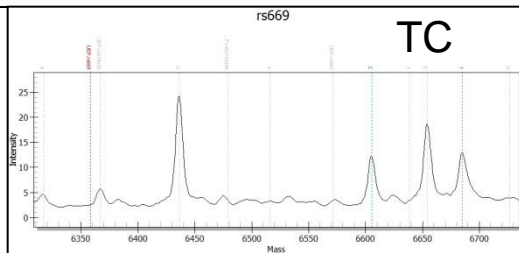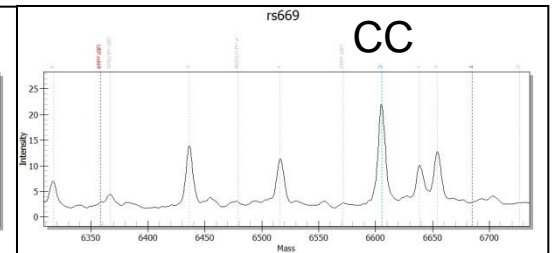

rs6265  
(*BDNF*)

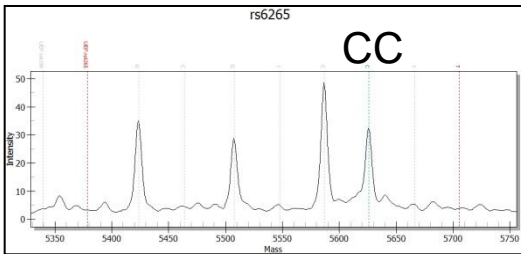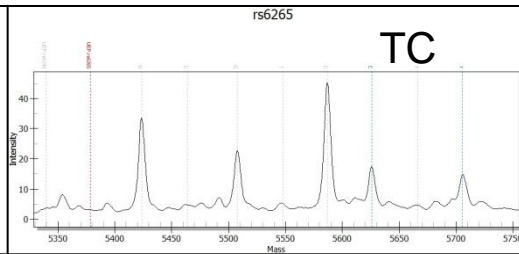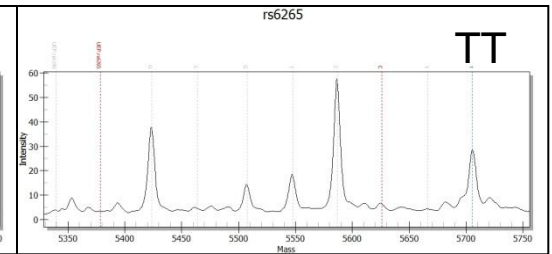

rs1799945  
(*HEE*)

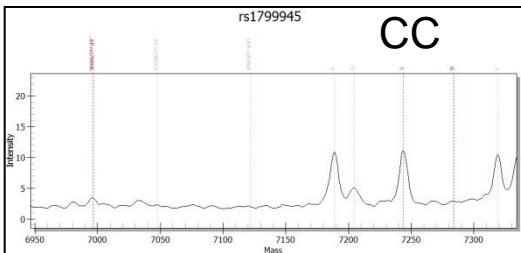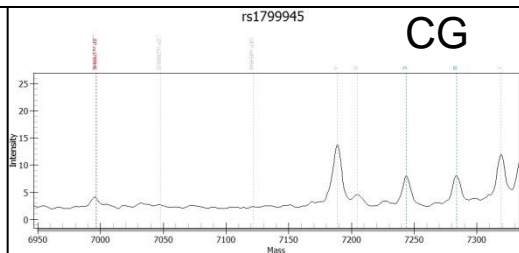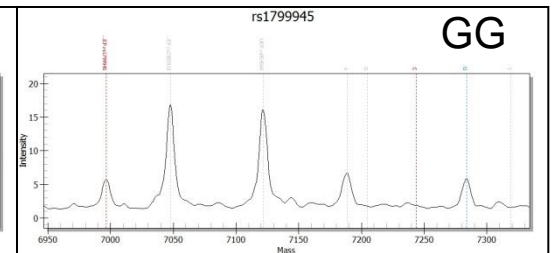

rs1800795  
(*IL6*)

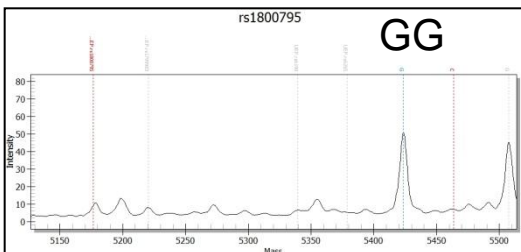

rs2290608  
(*IL5RA*)

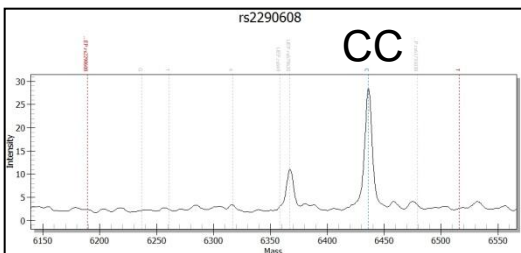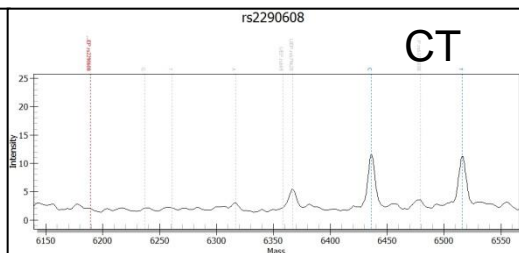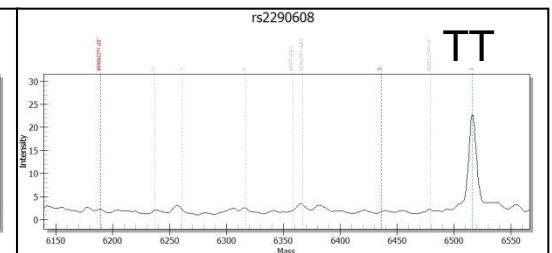

**Major homozygote**

**Heterozygote**

**Minor homozygote**

**rs689466**  
*(COX2)*

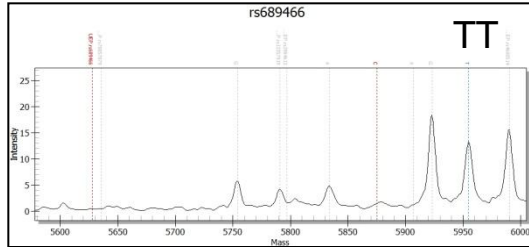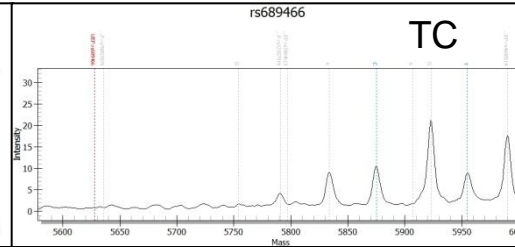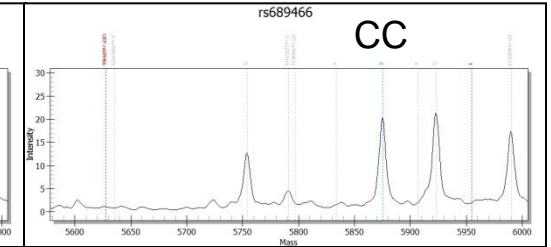

**rs20417**  
*(COX2)*

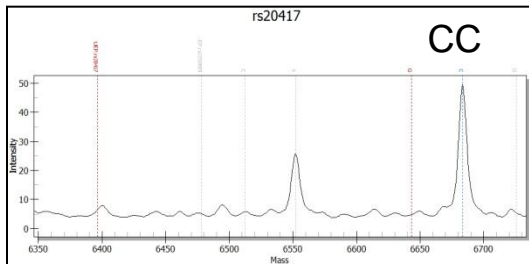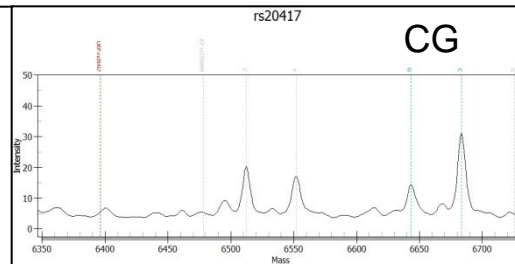

**rs2075575**  
*(AQP4)*

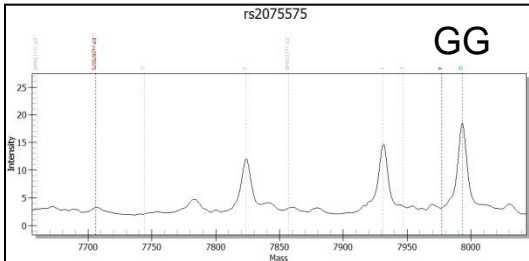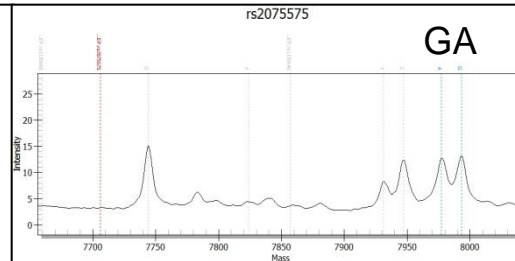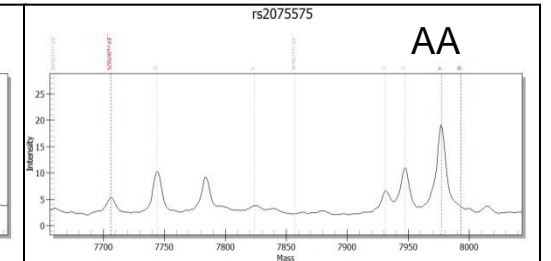

**rs9951307**  
*(AQP4)*

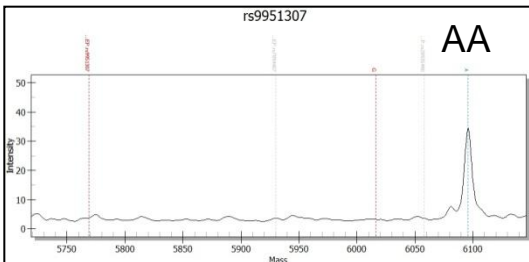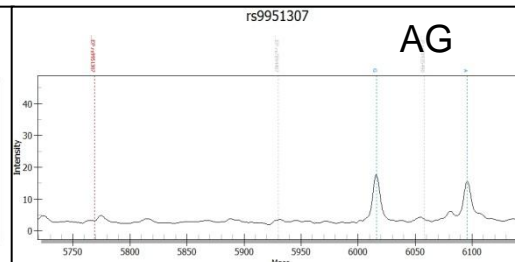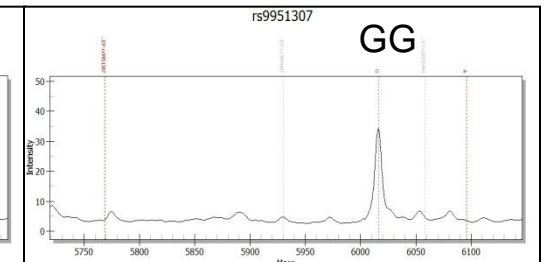

Supplement: Datasheet_1.pdf [file Datasheet_1.pdf]
